# Supplementary material
Source: MDPI journal article supplement (https://www.mdpi.com/2073-4395/11/4/670)
Supplement: s1 [file s1]

**Table S3. Number of differently expressed genes between Al stress and control.**

| Comparison | Up-regulated                  |                                           | Down-regulated                |                                           |
|------------|-------------------------------|-------------------------------------------|-------------------------------|-------------------------------------------|
|            | Number of transcript detected | Number of genes after removing redundancy | Number of transcript detected | Number of genes after removing redundancy |
| T-6h       | 912                           | 759                                       | 537                           | 451                                       |
| S-6h       | 1053                          | 850                                       | 660                           | 544                                       |
| T-12h      | 1484                          | 1233                                      | 761                           | 613                                       |
| S-12h      | 1664                          | 1356                                      | 1855                          | 1560                                      |
| T-24h      | 2796                          | 2240                                      | 1860                          | 1501                                      |
| S-24h      | 3628                          | 2908                                      | 4518                          | 3725                                      |

T: KF; S: GF
