# Supplementary material
Source: MDPI journal article supplement (https://www.mdpi.com/2073-4395/11/4/670)
Supplement: s1 [file s1]

**Table S2. Genes in glycolysis and tricarboxylic acid cycle pathways in response to Al at 24 h in the roots of KF (T) and GF (S).**

| Genes                                      | T-24h(FC) | S-24h(FC) | description              |
|--------------------------------------------|-----------|-----------|--------------------------|
| <b>Fructose-6-P to Fructose-1,6-bis-P1</b> |           |           |                          |
| Glyma.07g263800                            | 0.98      | 0.35      | Phosphofructokinase      |
| Glyma.18g145500                            | 0.91      | 0.36      | Phosphofructokinase      |
| Glyma.08g280700                            | 2.41      | 0.71      | Phosphofructokinase      |
| <b>PEP to Pyruvate</b>                     |           |           |                          |
| Glyma.16g173100                            | 0.86      | 0.23      | Pyruvate kinase          |
| Glyma.20g024800                            | 0.98      | 0.35      | Pyruvate kinase          |
| <b>PEP to Oxaloacetate (OAA)</b>           |           |           |                          |
| Glyma.06g229900                            | 0.69      | 0.18      | PEPC                     |
| Glyma.06g277500                            | 1.02      | 0.22      | PEPC                     |
| Glyma.13g270400                            | 0.85      | 0.15      | PEPC                     |
| <b>Isocitrate to 2-oxoglutarate</b>        |           |           |                          |
| Glyma.08g160500                            | 0.82      | 0.22      | Isocitrate dehydrogenase |
| Glyma.16g118900                            | 0.94      | 0.45      | Isocitrate dehydrogenase |
| <b>Succinate to Fumarate</b>               |           |           |                          |
| Glyma.02g057400                            | 0.58      | 0.17      | Succinate dehydrogenase  |
| Glyma.12g099000                            | 0.66      | 0.25      | Succinate dehydrogenase  |
| <b>Fumarate to Malate</b>                  |           |           |                          |
| Glyma.02g015700                            | 0.67      | 0.39      | Fumarate lyase           |

**FC:** Fold change

**Fructose-6-P:** fructose-6-phosphate;

**Fructose-1,6-bis-P1:** fructose-1,6-bisphosphatase;

**PEP:** phosphoenolpyruvate;

**PEPC:** Phosphoenolpyruvate Carboxylase;

**OAA:** Oxaloacetate.
